# Supplementary material
Source: bioRxiv or medRxiv preprint supplement (https://www.biorxiv.org/content/biorxiv/early/2020/07/25/2020.07.24.219840.1/DC1/embed/media-1.pdf)
Supplement: Supplementary file [file media-1.pdf]

1 **Supplementary Materials**

2

3 **Title:** The developmental and genetic architecture of the sexually selected male ornament of swordtails

4

5 **Authors:** Manfred Schartl<sup>1,2</sup>, Susanne Kneitz<sup>3</sup>, Jenny Ormanns<sup>3</sup>, Cornelia Schmidt<sup>3</sup>, Jennifer L  
6 Anderson<sup>4</sup>, Angel Amores<sup>5</sup>, Julian Catchen<sup>6</sup>, Catherine Wilson<sup>5</sup>, Dietmar Geiger<sup>7</sup>, Kang Du<sup>1,2</sup>, Mateo  
7 Garcia-Olazábal<sup>8</sup>, Sudha Sudaram<sup>9</sup>, Christoph Winkler<sup>9</sup>, Rainer Hedrich<sup>7</sup>, Wesley C Warren<sup>10</sup>, Ronald  
8 Walter<sup>2</sup>, Axel Meyer<sup>11 #</sup>, John H Postlethwait<sup>5 #</sup>

9

10 <sup>1</sup>Developmental Biochemistry, Biocenter, University of Wuerzburg, Am Hubland, 97074 Wuerzburg,  
11 Germany

12 <sup>2</sup>The Xiphophorus Genetic Stock Center, Department of Chemistry and Biochemistry, Texas State  
13 University, San Marcos, Texas, TX 78666, USA

14 <sup>3</sup>Biochemistry and Cell Biology, Biocenter, University of Wuerzburg, Am Hubland, 97074 Wuerzburg,  
15 Germany

16 <sup>4</sup>Systematic Biology, Department of Organismal Biology, Uppsala University, Norbyvägen 18D, 752  
17 36 Uppsala, Sweden

18 <sup>5</sup>Institute of Neuroscience, University of Oregon, Eugene, Oregon, OR 97401, USA

19 <sup>6</sup>Department of Animal Biology, University of Illinois, Urbana, Illinois, IL 6812, USA

20 <sup>7</sup>Julius-von-Sachs-Institute for Biosciences, Molecular Plant Physiology and Biophysics, Biocenter,  
21 University Würzburg, Julius-von-Sachs-Platz 2, 97082 Würzburg, Germany.

22 <sup>8</sup>Department of Biology, Texas A&M University, College Station, Texas, TX 77843, USA.

23 <sup>9</sup>Department of Biological Sciences and Centre for Bioimaging Sciences, National University of  
24 Singapore, Singapore 117543, Singapore

25 <sup>10</sup>Bond Life Sciences Center, University of Missouri, Columbia, MO USA

26 <sup>11</sup>Lehrstuhl für Zoologie und Evolutionsbiologie, Department of Biology, University of Konstanz,  
27 Universitätsstraße 10, 78457 Konstanz, Germany

28

29

30 # Corresponding authors

31

## 32 **Material and Methods**

### 33 **Experimental Animals**

34 All fish were reared under a standard conditions [1] with a light/dark cycle of 14/10 h at 26 °C  
35 in the fish facility of the Biocenter at the University of Wuerzburg, Germany. All animals were  
36 kept and sampled in accordance with the applicable EU and national German legislation  
37 governing animal experimentation. In particular, all experimental protocols were approved  
38 through an authorization (568/300-1870/13) of the Veterinary Office of the District  
39 Government of Lower Franconia, Germany, in accordance with the German Animal Protection  
40 Law (TierSchG).

41 For regeneration experiments, fish were immobilized by dipping into 4°C water, and the caudal  
42 margin of the tail fin was resected with a razor blade. Tissues were collected at different stages  
43 of regeneration (fig. S2). Samples from *X. hellerii* females and the swordless males of *Priapella*  
44 *lacondonae* and *X. maculatus* were taken after caudal fin resection at the same day according to  
45 male sword regeneration stages. Tissues from naturally developing swords and the median and  
46 upper caudal fin margin of male *X. hellerii* were sampled at different stages according to fig.  
47 S1. Induction of the sword in mature female *X. hellerii* (4-5 months old) was done by addition  
48 of 17-methyl testosterone to the tank water (30 µg/l = 1µMol, replenished daily). The dorsal,  
49 median and ventral caudal fin margins, including the sword were collected after 11 days of  
50 treatment at a stage corresponding to naturally developing sword stage 4 (fig. S1). Areas used  
51 for RNA-seq and qPCR experiments are depicted in fig. S15. Samples from 15 – 20 individuals  
52 were pooled for RNA extraction.

### 53 **RNA-seq transcriptomics**

54 Total RNA was isolated using TRIzol Reagent (Thermo Fisher Scientific, Waltham, USA) according to  
55 the supplier's recommendation. Custom sequencing (BGI, Shenzhen, China) of TruSeq libraries  
56 generated 25-30 million 100bp paired end reads for each sample on the Illumina Hiseq4000 platform.

57

### 58 **Differential gene expression analysis**

59 After duplicate and barcode removal reads were aligned to the *Xiphophorus\_hellerii*-4.1 genome  
60 ([https://www.ncbi.nlm.nih.gov/genome/15325?genome\\_assembly\\_id=7477339](https://www.ncbi.nlm.nih.gov/genome/15325?genome_assembly_id=7477339)) using the STAR  
61 aligner version 2.5 (--runMode alignReads --quantMode GeneCounts) [2]. Resulting read counts were  
62 used by DESeq2 [3] for differential gene analysis. Datasets generated at different time points were  
63 analyzed separately.



64 For further analysis, only expressed genes were considered. “Expressed” was defined as normalized  
65 read count  $\geq 10$  in at least one sample in datasets “female” (regeneration of caudal fin in adult females),  
66 “sword development” (normal sword development in young males at puberty), testosterone induced  
67 sword in adult females (“testosterone induced sword”) or “regeneration” (regeneration of tail fin and  
68 sword in adult males). We added a published dataset (“testosterone treated juveniles”) [4] of an  
69 independent testosterone treatment for sword induction in 3 months old undifferentiated juvenile *X.*  
70 *hellerii*. Because dataset “testosterone treated juveniles” has four replicates for each sample a gene was  
71 required to have a normalized read count  $\geq 10$  in at least two samples. Subsequently all datasets were  
72 filtered for genes with a log<sub>2</sub> fold change  $\geq 1$  up or down, respectively, in at least one time point.  
73 Differentially expressed genes of the four male datasets were represented in a Venn diagram  
74 (<https://bioinfogp.cnb.csic.es/tools/venny/>) (fig. S3) and the overlap of all four datasets generated  
75 dataset “common in all male” (table S1). Next, all genes that showed the same differential regulation in  
76 “female” were removed from “common in all male”, and the remaining 54 genes (table S1) were  
77 annotated for their chromosomal location.

78

79

#### 80 **qPCR expression analysis**

81 Total RNA was isolated from pooled samples using TRIzol Reagent (Thermo Fisher Scientific,  
82 Waltham, USA) according to the supplier’s recommendation. After DNase treatment, total RNA (1-2  
83  $\mu\text{g}$ ) was reverse transcribed using the RevertAid First Strand cDNA Synthesis kit (Thermo Fisher  
84 Scientific, Waltham, USA) and random hexamer primers, according to the manufacturer's instructions.  
85 For real-time qRT-PCR, cDNA from 50 ng of total RNA was used. All results reported here are averages  
86 of at least two independent reverse transcription (RT) reactions and two PCR experiments from each  
87 such reaction. Primer sequences are listed in table S4. Amplification was monitored using a  
88 Mastercycler ep realplex<sup>2</sup> (Eppendorf, Hamburg, Germany). For quantification, expression of each gene  
89 was normalized to the housekeeping gene *ef1a1* (elongation factor 1 alpha 1) using the delta Ct method  
90 [5].

91 qPCR expression analysis was performed to confirm differential expression results from the RNA-seq  
92 datasets from *X. hellerii* and to monitor differential expression in other species (*X. maculatus*, *X.*  
93 *montezumae*, *X. monticolus*, *X. pygmaeus*, *P. lacandonae*, *O. latipes*) (figs. S4-10). Transcript  
94 abundance was also measured for several genes located under the chromosome 13 QTL peak to confirm  
95 that they are not differentially expressed in sword regeneration (figs. S19-20), for *tyrp1*, a marker for  
96 pigment cell differentiation (fig. 21) and *msxC* (fig. S22), a previously postulated sword gene candidate  
97 [6].

98

#### 99 **Sequence alignment of *kcnh8***

100 Protein sequences of Kcnh8 were retrieved for different species: *X.hellerii* and *X.couchianus* from NCBI  
101 (XP\_032437747.1, XP\_027893054.1); *X.maculatus* from Ensembl (ENSXMAP00000000856);  
102 *X.birchmanni* and *X.malinche*, from a previous study [7]; *X.signum*, *X.mixei*, *X.montezumae*,  
103 *X.clemenciae*, *X.monticolus*, *X.kallmani*, *X.mayae*, *X.andersi*, *X.pygmaeus*, *X.continens*,  
104 *X.multilineatus*, *X.nigrensis*, *X.milleri*, *X.gordoni*, *X.meyeri*, *X.evelynae*, *X.xiphidium* and *X.variatus*,  
105 from raw NGS reads.

106 To retrieve the sequence from raw NGS reads, first, we collected all related reads by aligning  
107 them to the existing protein sequences from reference genomes using DIAMOND [8]. The kept reads  
108 were then assembled into exon-fragments using CAP3 [9]. For each fragment we determined its best  
109 translation frame by mapping it onto the reference protein sequences using GeneWise [10]. Finally, the  
110 resulting protein fragments were ordered and merged into a complete sequence according to the  
111 alignment.

112

### 113 **QTL mapping**

114 To identify regions of the genome associated with the sword trait, the Sword Index (SI), which is the  
115 sword length divided by standard length, was determined. F1 individuals were obtained from a cross of  
116 a female *Xiphophorus hellerii* (Rio Lancetilla strain) with a male *X. maculatus* (Jp163A strain) aided by  
117 artificial insemination. The low fertility of F1 intercrosses [11] precluded the production of F2 families,  
118 so we performed two backcrosses of *X. maculatus* /*X. hellerii* F1 males with *X. hellerii* (Rio Lancetilla  
119 strain) females as the recurrent parent. Quantitative trait locus (QTL) analysis was performed in R/qtl  
120 v.1.39-5 [12] with phenotype (herein) and genotype data for 85 males and 16,250 RAD-tag loci and the  
121 genetic map from Amores and colleagues [13]. Backcross generation males for mapping were produced  
122 by two sires; 60 offspring from male #2059 crossed with four full-sib females (44, 2, 12, and 2 offspring  
123 per female) and 25 from male #2074, all from one female. The dataset was coded as homozygous for  
124 the genotype of the backcross parent *X. hellerii* (data code b), or heterozygous (h) with alleles from *X.*  
125 *hellerii* and *X. maculatus*. Interval mapping was performed using the non-parametric model due to the  
126 non-normal distribution of the SI phenotype. Genotype probabilities were calculated at a maximum  
127 distance of 1 centiMorgan and markers with identical genotypes were removed from the analysis. The  
128 genome-wide significance threshold was determined using a permutation test with 1000 replicates. The  
129 marker sequences (table S5) used for QTL mapping were later aligned to the *X. maculatus* genome  
130 (NCBI GCF\_002775205.1) and the *X. hellerii* genome (GCA\_003331165.2) with GSNAP version  
131 2018-03-25 [14] (table S3).

132

### 133 **Electrophysiology**

134 To generate cRNA for functional characterization of *Xiphophorus hellerii* Kcnh8 in *Xenopus* oocytes,  
135 the coding sequence of *Xiphophorus hellerii kcnh8* was cloned into oocyte expression vector pNBI16  
136 (pGEM-based vector) using the USER-technique [15]. The construct was verified by sequencing. cRNA

137 of *kcnh8* was prepared using the AmpliCap-Max™ T7 High Yield Message Maker Kit (Cellscript,  
138 Biozym Scientific GmbH, Hessisch Oldendorf, Germany). Oocyte preparation and cRNA injection have  
139 been described elsewhere [16]. Following the injection of 20 ng cRNA per oocyte, oocytes were  
140 incubated at 16°C for 24 to 36 hours in ND96 solution (96 mM NaCl, 2 mM KCl, 1 mM CaCl<sub>2</sub>, 1 mM  
141 MgCl<sub>2</sub>, 10 mM Hepes pH7,4) supplemented with 50 mg/l gentamycin.

142

143 In two-electrode voltage-clamp studies, oocytes were perfused with KCl-containing solutions, based on  
144 Tris/Mes buffers. The standard solution contained 10 mM Tris/Mes, pH 7.5, 1 mM CaCl<sub>2</sub>, 1 mM MgCl<sub>2</sub>,  
145 30 mM KCl and 70 mM LiCl. If appropriate, osmolarity was adjusted to 220 mOsmol/kg using D-  
146 sorbitol. For measurements at varying K<sup>+</sup> concentrations, the ionic strength was kept constant by  
147 replacing KCl with LiCl and vice versa. Voltage-dependent activation of *Kcnh8*-expressing oocytes was  
148 recorded with voltage-pulse-protocols designed and applied with the acquisition software Patchmaster  
149 (HEKA Elektronik GmbH, Lambrecht/Pfalz, Germany). Proceeding from a holding potential (V<sub>H</sub>) of -  
150 20 mV, a series of 4s test voltage pulses ranging from +40 to -140 mV in 10 mV decrements were  
151 applied. Steady state currents (I<sub>ss</sub>) were extracted at the end of the test voltage pulses.

152

153

154

155

156

157

158

159

## 160 References

161

- 162 1. Kallman, K., *The platyfish, Xiphophorus maculatus*, in *Handbook of Genetics*, K. RC,  
163 Editor. 1975, Plenum Press: New York, N.Y. p. 81-132.
- 164 2. Dobin, A., et al., *STAR: ultrafast universal RNA-seq aligner*. *Bioinformatics*, 2013.  
165 **29**(1): p. 15-21.
- 166 3. Love, M.I., W. Huber, and S. Anders, *Moderated estimation of fold change and*  
167 *dispersion for RNA-seq data with DESeq2*. *Genome Biol*, 2014. **15**(12): p. 550.
- 168 4. Kang, J.H., et al., *Transcriptomics of two evolutionary novelties: how to make a*  
169 *sperm-transfer organ out of an anal fin and a sexually selected "sword" out of a*  
170 *caudal fin*. *Ecol Evol*, 2015. **5**(4): p. 848-64.
- 171 5. Simpson, D.A., et al., *Retinal VEGF mRNA measured by SYBR green I fluorescence:*  
172 *A versatile approach to quantitative PCR*. *Mol Vis*, 2000. **6**: p. 178-83.
- 173 6. Zauner, H., et al., *Differential regulation of msx genes in the development of the*  
174 *gonopodium, an intromittent organ, and of the "sword," a sexually selected trait of*  
175 *swordtail fishes (Xiphophorus)*. *Evol Dev*, 2003. **5**(5): p. 466-77.
- 176 7. Powell, D.L., et al., *Natural hybridization reveals incompatible alleles that cause*  
177 *melanoma in swordtail fish*. *Science*, 2020. **368**(6492): p. 731-736.
- 178 8. Buchfink, B., C. Xie, and D.H. Huson, *Fast and sensitive protein alignment using*  
179 *DIAMOND*. *Nature methods*, 2015. **12**(1): p. 59-60.
- 180 9. Huang, X. and A. Madan, *CAP3: A DNA sequence assembly program*. *Genome*  
181 *research*, 1999. **9**(9): p. 868-877.

182 10. Birney, E., M. Clamp, and R. Durbin, *GeneWise and genomewise*. *Genome research*,  
183 2004. **14**(5): p. 988-995.  
184 11. Franchini, P., et al., *Long-term experimental hybridisation results in the evolution of a*  
185 *new sex chromosome in swordtail fish*. *Nat Commun*, 2018. **9**(1): p. 5136.  
186 12. Broman, K.W., et al., *R/qt1: QTL mapping in experimental crosses*. *Bioinformatics*,  
187 2003. **19**(7): p. 889-90.  
188 13. Amores, A., et al., *A RAD-Tag Genetic Map for the Platyfish (Xiphophorus*  
189 *maculatus) Reveals Mechanisms of Karyotype Evolution Among Teleost Fish*.  
190 *Genetics*, 2014. **197**(2): p. 625-641.  
191 14. Wu, T.D. and C.K. Watanabe, *GMAP: a genomic mapping and alignment program for*  
192 *mRNA and EST sequences*. *Bioinformatics*, 2005. **21**(9): p. 1859-75.  
193 15. Nour-Eldin, H.H., et al., *Advancing uracil-excision based cloning towards an ideal*  
194 *technique for cloning PCR fragments*. *Nucleic Acids Res*, 2006. **34**(18): p. e122.  
195 16. Becker, D., et al., *Changes in voltage activation, Cs<sup>+</sup> sensitivity, and ion permeability*  
196 *in H5 mutants of the plant K<sup>+</sup> channel KAT1*. *Proc Natl Acad Sci U S A*, 1996.  
197 **93**(15): p. 8123-8.

198  
199  
200  
201

**Supplementary Figures**

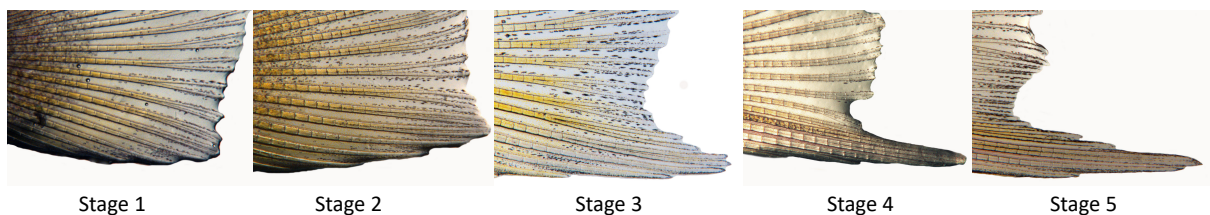

202  
203  
204  
205

**Fig. S1: Stages of normal sword development in *Xiphohorus hellerii* males during puberty.**

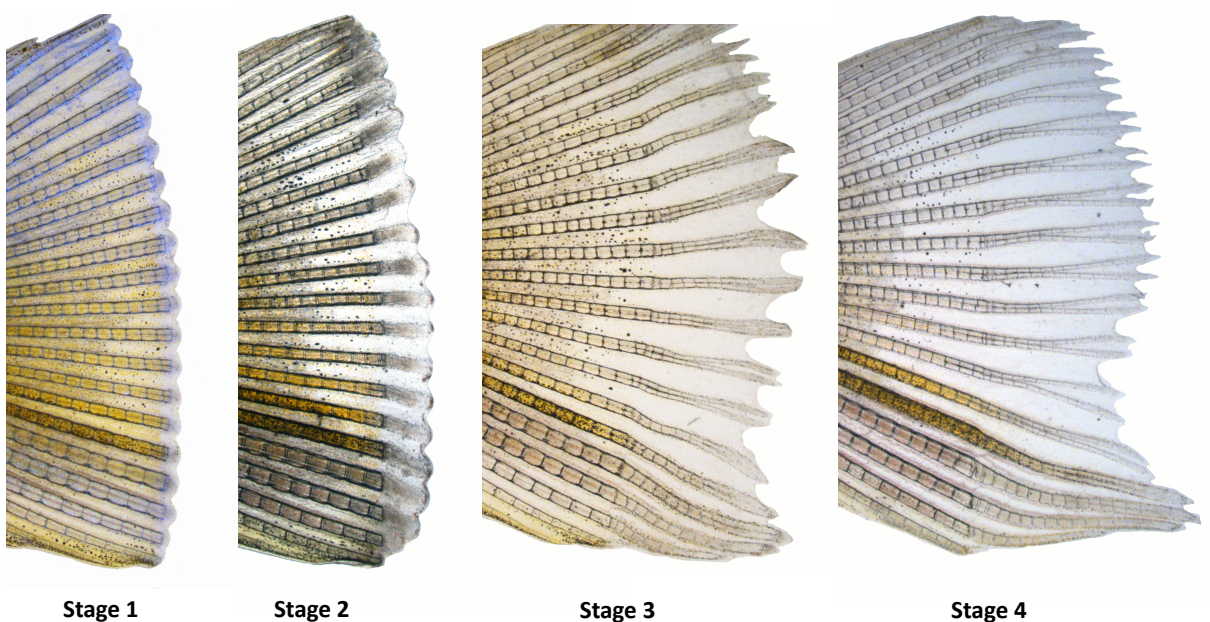

206  
207  
208

**Fig. S2: Stages of sword regeneration in *Xiphohorus hellerii* males.**

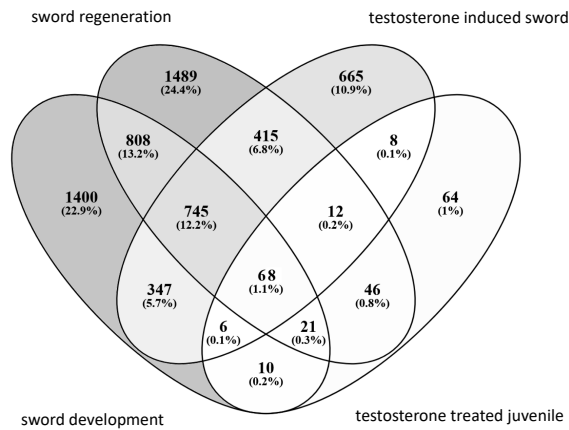

209  
 210 **Fig. S3. Venn diagram of differentially expressed genes.** Numbers of genes with  
 211  $\log_2FC \geq 1$  between upper and lower caudal fin margin during natural sword development  
 212 (stage 1-5), sword regeneration (days 0-10), testosterone induced sword in females and  
 213 testosterone treated juvenile *Xiphophorus hellerii*.  
 214

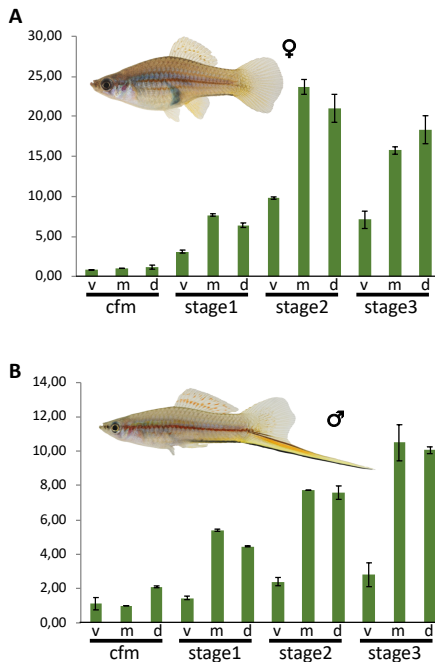

215  
 216 **Fig. S4: Establishment of a spatial expression pattern of leukocyte receptor kinase (*ltk*)**  
 217 **in the caudal fin during regeneration.** Expression of *ltk* in the caudal fin margin of the tail  
 218 (cfm) and during regeneration stages of adult *Xiphophorus hellerii* females (**A**) and males (**B**)  
 219 (v, ventral, m, median, d, dorsal compartment). Vertical axis indicates fold change of  
 220 expression normalized to cfm, m.  
 221

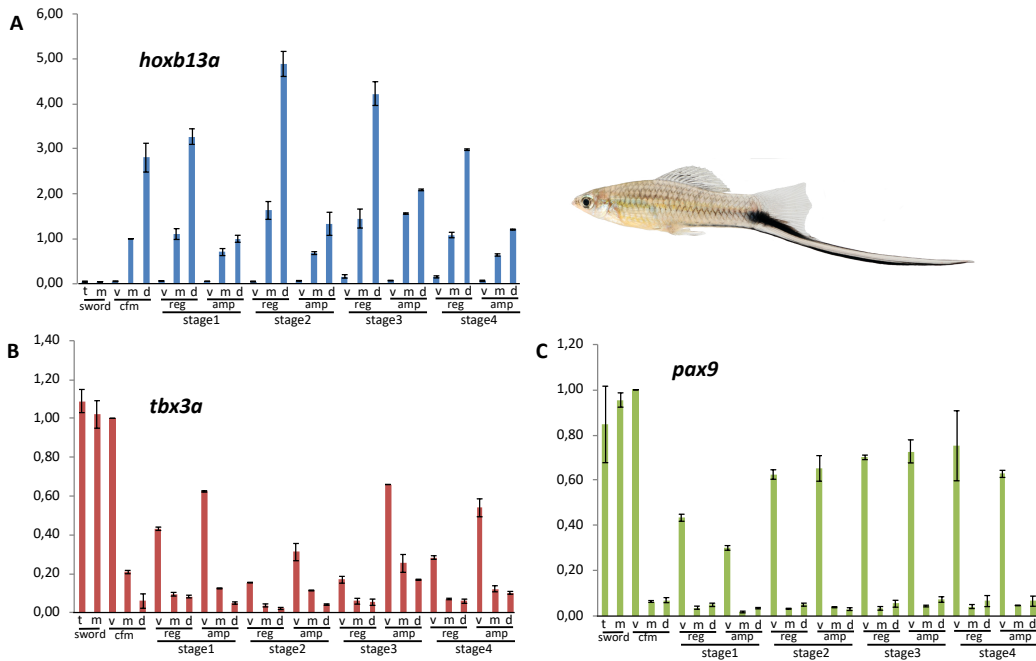

222 **Fig. S5: Spatial expression pattern of transcription factor genes in the caudal fin and**  
 223 **sword of male *Xiphophorus montezumae*.** Expression of *hoxb13a* (A), *tbx3a* (B) and *pax9*  
 224 (C) in the caudal fin margin of the tail fin (cfm), the median sector (m) and tip (t) of the  
 225 sword and during sword regeneration (v, ventral, m, median, d, dorsal compartment) in the  
 226 regenerating tissue (reg) and the compartment proximal to the regenerate (amp). Vertical axis  
 227 indicates fold change of expression normalized to cfm, v (*tbx3a*, *pax9*) or cvm, m (*hoxb13a*).  
 228  
 229

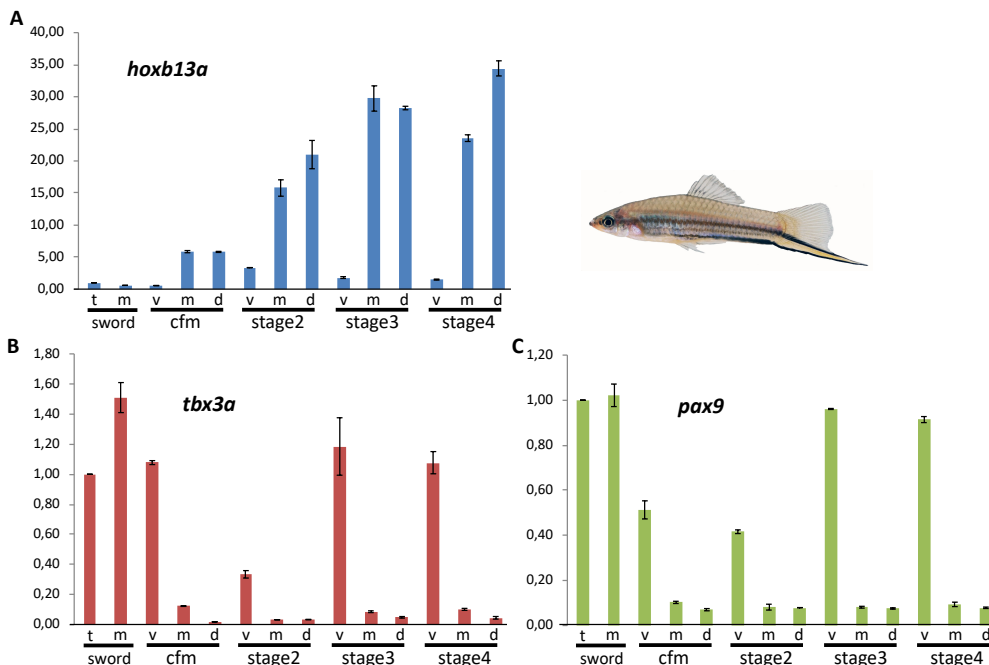

230 **Fig. S6: Spatial expression pattern of transcription factor genes in the caudal fin and**  
 231 **sword of male *Xiphophorus monticolus*.** Expression of transcription factor genes *hoxb13a*  
 232 (A), *tbx3a* (B) and *pax9* (C) in the caudal fin margin of the tail fin (cfm) of adult *Xiphophorus*  
 233 *monticolus* males, the median sector (m) and tip (t) of the sword and during sword  
 234 regeneration (v, ventral, m, median, d, dorsal compartment). Vertical axis indicates fold  
 235 change of expression normalized to sword, t.  
 236  
 237



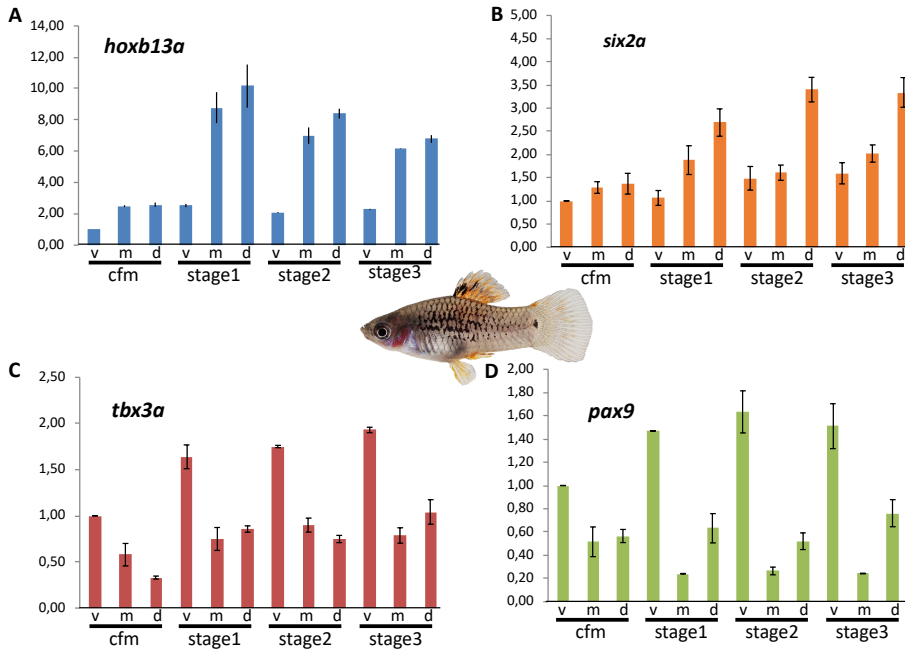

238  
 239 **Fig. S7: Spatial expression pattern of transcription factor genes in the caudal fin of male**  
 240 ***Xiphophorus maculatus***. Expression of transcription factor genes *hoxb13a*, *six2a*, *tbx3a* and  
 241 *pax9* in the caudal fin margin of the tail fin (cfm) and during tail fin regeneration (v, ventral,  
 242 m, median, d, dorsal compartment). Vertical axis indicates fold change of expression  
 243 normalized to cfm, v.  
 244

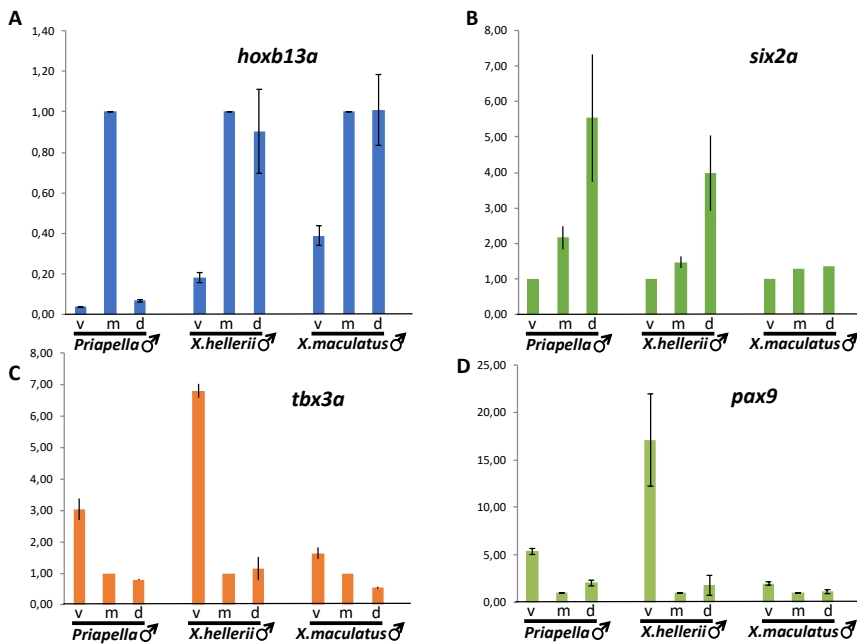

245  
 246 **Fig. S8: Comparison of transcription factor expression patterns in different species.**  
 247 Expression of transcription factor genes *hoxb13a* (A), *six2a* (B), *tbx3a* (C) and *pax9* (D) in  
 248 the caudal fin margin of the tail fin of adult males of *Priapella lacandona*, *Xiphophorus*  
 249 *hellerii* and *Xiphophorus maculatus*. (v, ventral, m, median, d, dorsal compartment). Vertical  
 250 axis indicates fold change of expression normalized to cfm, m (A,C,D) or cfm, v(B).  
 251

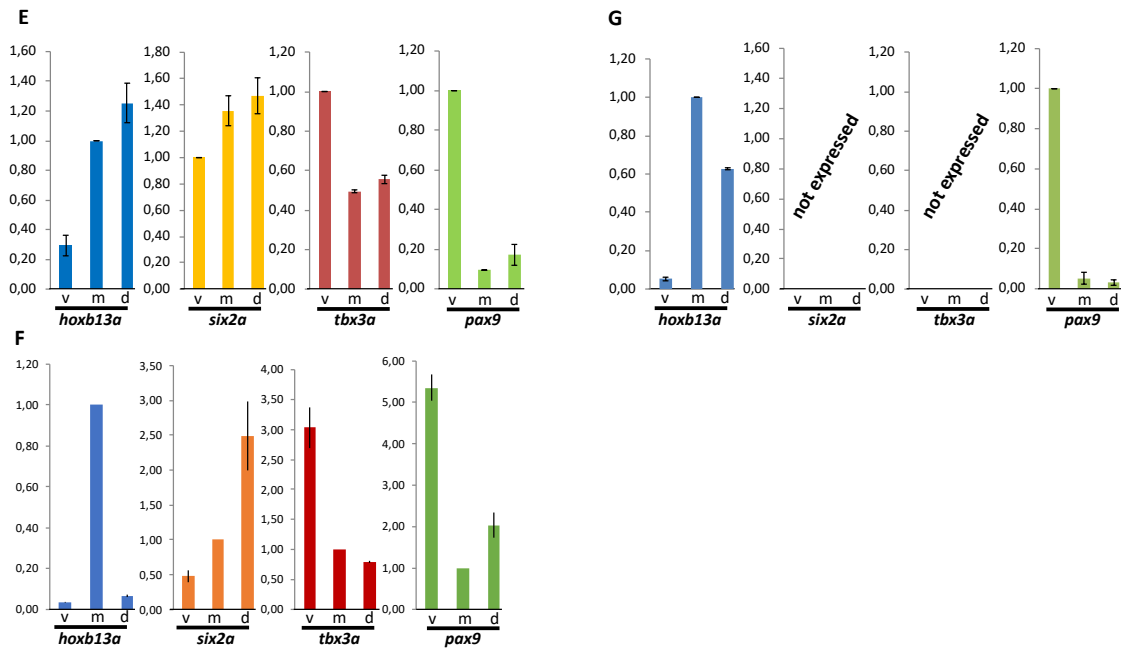

252 **Fig. S9: Comparison of transcription factor expression patterns in different species.**  
 253 Expression of *hoxb13a*, *six2a*, *tbx3a* and *pax9* in the caudal fin margin of the tail fin (cfm) of  
 254 (E) adult pygmy swordtails, *Xiphophorus pygmaeus*, (F) *Priapella lacandonae* and (G)  
 255 medaka, *Oryzias latipes*. v, ventral, m, median, d, dorsal compartment. Vertical axis indicates  
 256 fold change of expression normalized to cfm, m, except for medaka *pax9* and *X. pygmaeus*  
 257 *six2a*, *tbx3a* and *pax9*, cfm, v.  
 258  
 259

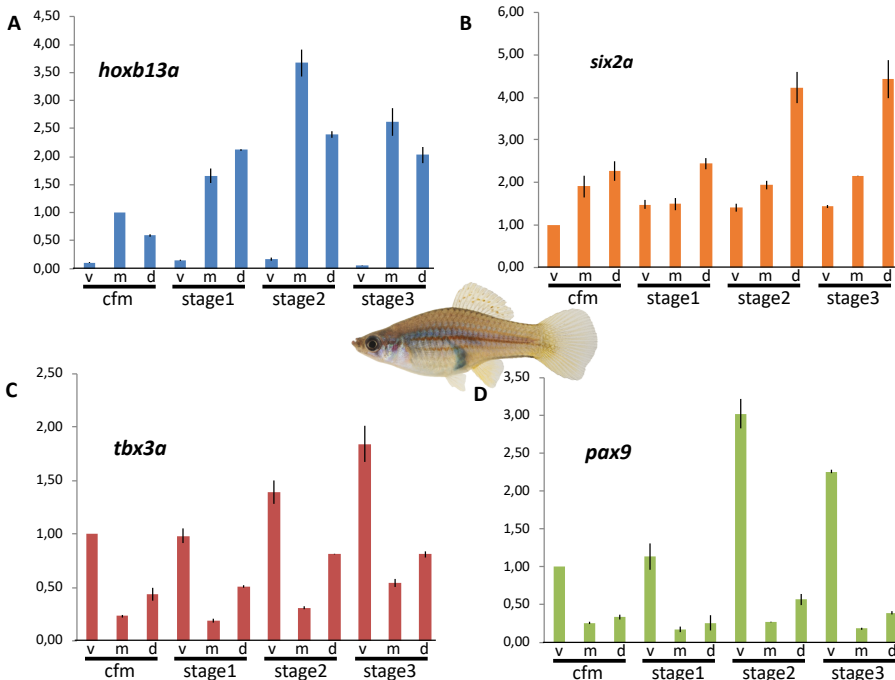

260 **Fig. S10: Spatial expression pattern of transcription factor genes in the caudal fin of**  
 261 *Xiphophorus hellerii* females. Expression of *hoxb13a* (A), *six2a* (B), *tbx3a* (C) and *pax9* (D)  
 262 in the caudal fin margin of the tail fin (cfm) and during tail fin regeneration (v, ventral, m,  
 263 median, d, dorsal compartment). Vertical axis indicates fold change of expression normalized  
 264 to cvm, v (*six2a*, *tbx3a*, *pax9*) or cfm, m (*hoxb13a*).  
 265



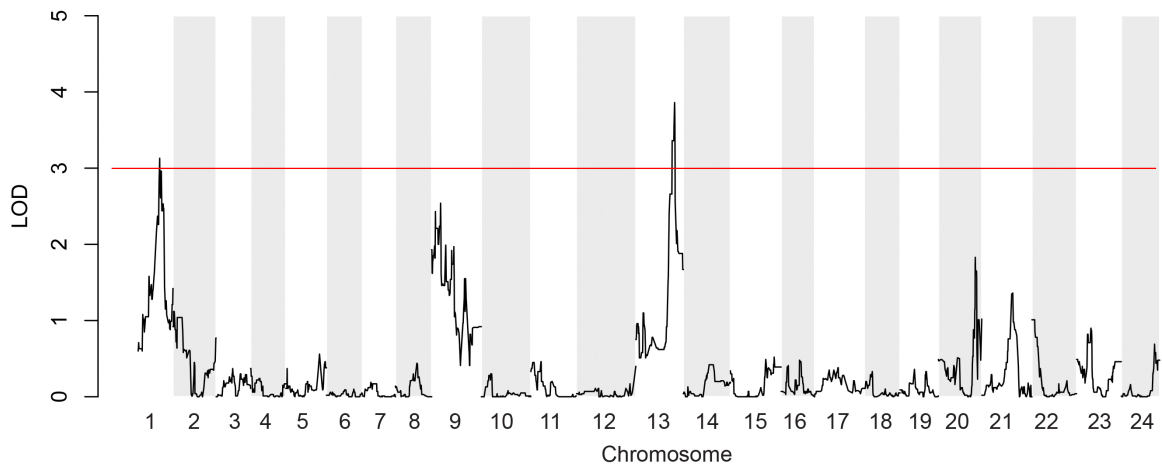

266  
 267 **Fig. S11. Manhattan plot of quantitative trait loci (QTL) mapping results for sword**  
 268 **length.** One major QTL peak is located on chromosome 13, two minor peaks on  
 269 chromosomes 1 and 9, and several smaller peaks on chromosomes 20 – 24. The plot depicts  
 270 aligned RAD-tag positions on the *Xiphophorus hellerii* genome version 4.1 with maximum  
 271 likelihood statistics.  
 272

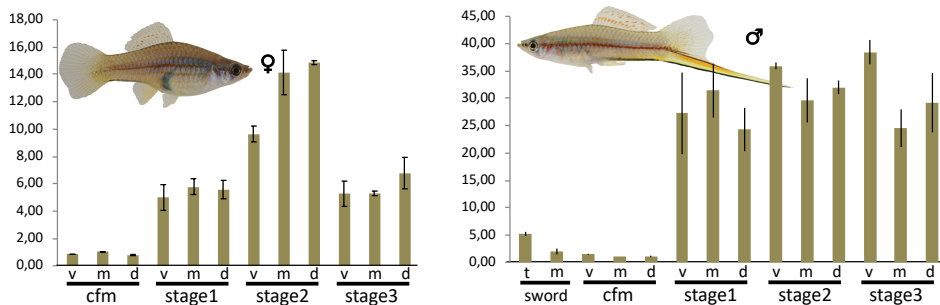

273  
 274 **Fig. S12: Spatial expression pattern of *fkbp9*.** Expression in the caudal fin margin of the tail  
 275 fin (cfm) of adult *Xiphophorus hellerii* females (left) and males (right), the median sector (m)  
 276 and tip (t) of the sword and during regeneration (v, ventral, m, median, d, dorsal  
 277 compartment). Vertical axis indicates fold change of expression normalized to cfm, m.  
 278

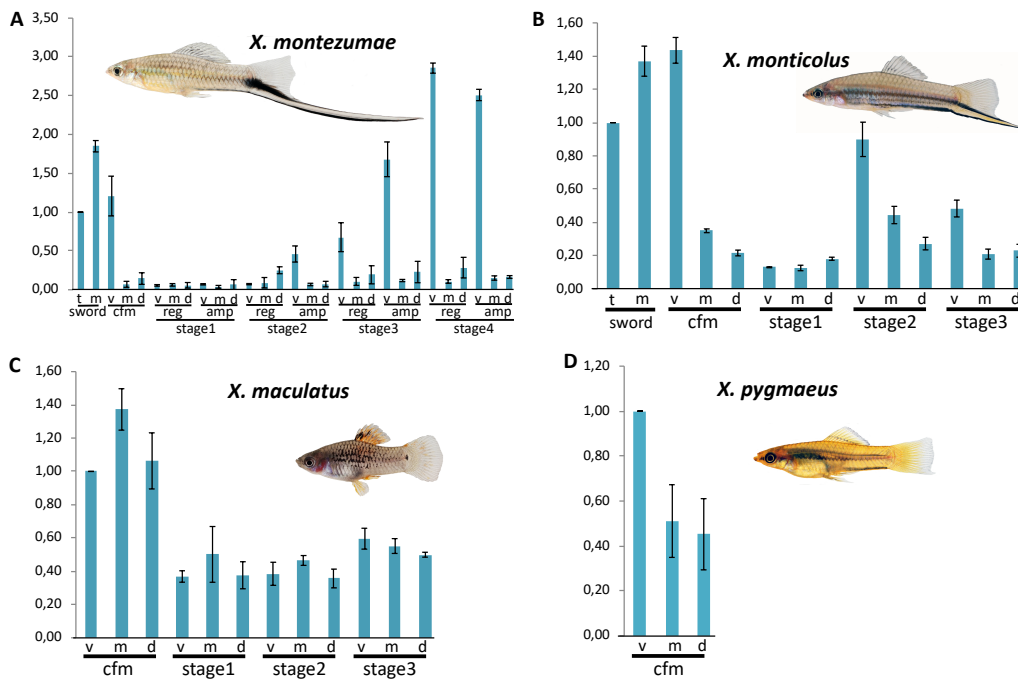

279  
 280 **Fig. S13: Spatial expression pattern of transcription factor genes in the caudal fin of**  
 281 ***Xiphophorus* species.** Expression of *kcnh8* in the caudal fin margin of the tail fin (cfm) of  
 282 adult *Xiphophorus montezumae* (A), *X. monticolus* (B), *X. maculatus* (C) and *X. pygmaeus*  
 283 (D) males, the median sector (m) and tip (t) of the sword and during sword regeneration (v,  
 284 ventral, m, median, d, dorsal compartment). Vertical axis indicates fold change of expression  
 285 normalized to sword, t (A), (B) and cfm, v (C), (D).  
 286

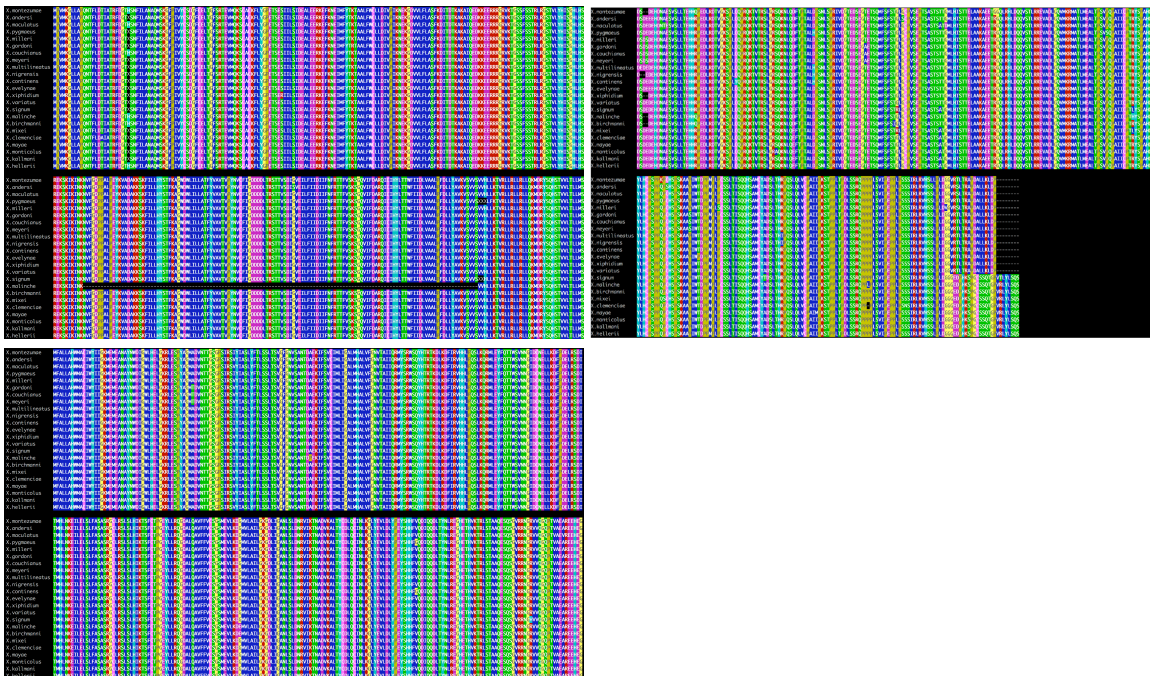

287  
 288 **Fig. S14: Alignment of protein sequences of Kcnh8 from *Xiphophorus* species.** The  
 289 missing sequence from *X. malinche* (corresponding to one exon) is most likely due to a  
 290 misassembly.  
 291

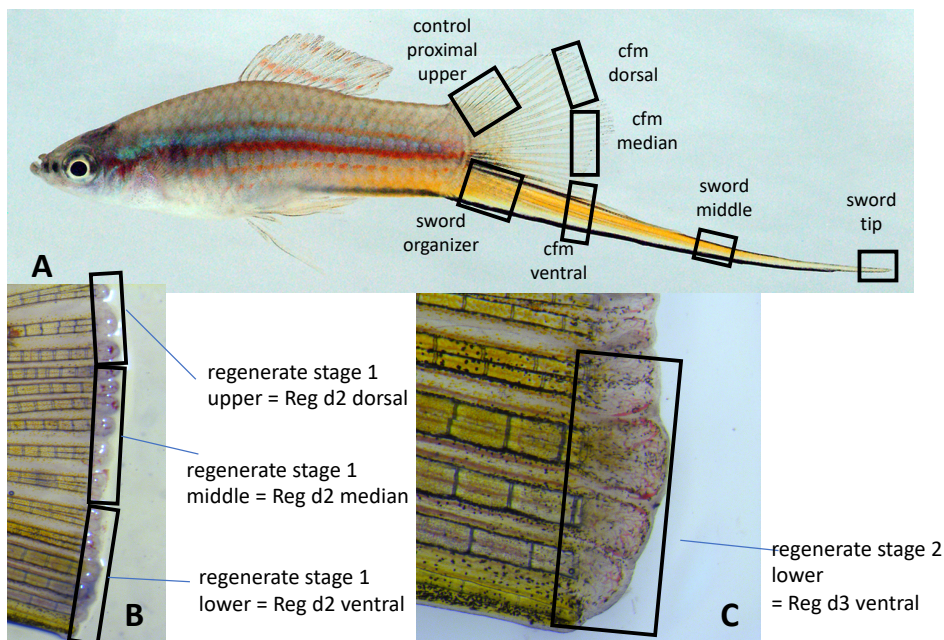

292  
293  
294  
295  
296  
297

**Fig. S15: Compartments used for sampling** (indicated by black boxes). (A) Regions of the tail fin taken for amputation. Cfm. Caudal fin margin (B) Regenerate blastema at 2 dpa and regions taken for RNA extractions (C) Regenerate blastema at 3 dpa, the ventral part (boxed) starts to grow more than median and dorsal

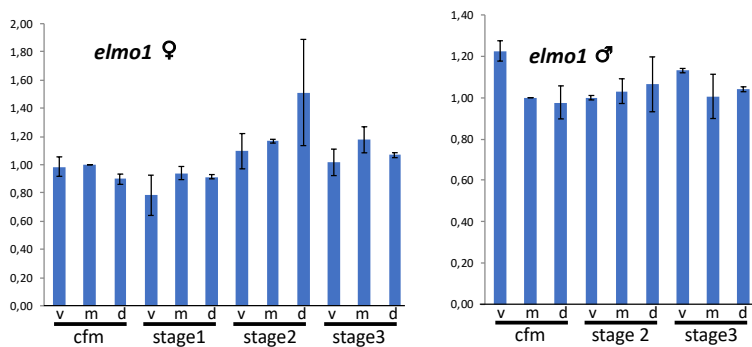

298  
299  
300  
301  
302  
303

**Fig. S16: Expression pattern of *elmo1*, a gene located on chromosome 13 in the QTL region.** Expression of *elmo1* in the caudal fin margin of the tail fin (cfm) of adult *Xiphophorus hellerii* females (left) and males (right) Vertical axis indicates fold change of expression normalized to cfm, m.

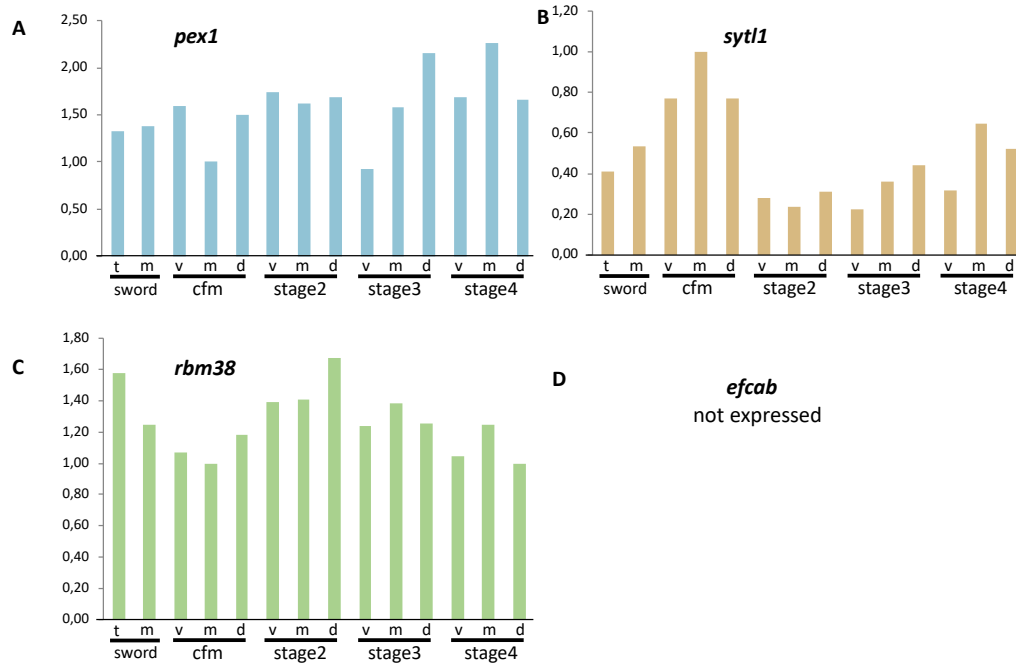

304  
 305 **Fig. S17: Expression pattern of genes located on chromosome 13 in the QTL region, in**  
 306 **the caudal fin and sword of male *Xiphophorus hellerii*** Expression of *pex1* (A), *sytl1* (B)  
 307 and *rbm38* (C) in the caudal fin margin of the tail fin (cfm), the median sector (m) and tip (t)  
 308 of the sword and during sword regeneration (v, ventral, m, median, d, dorsal compartment).  
 309 *efcab* expression (D) was not detected. Vertical axis indicates fold change of expression  
 310 normalized to cfm, m.  
 311

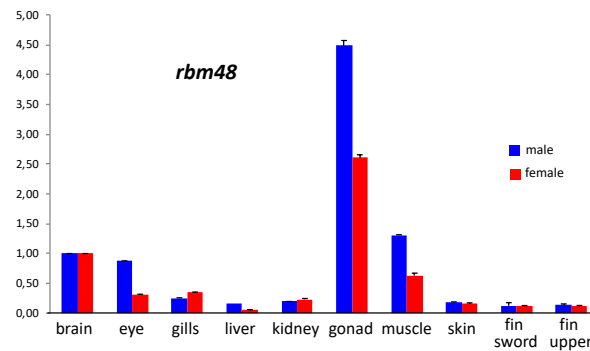

312  
 313 **Fig. S18: Expression pattern of *rbm48*, a gene located on chromosome 13 in the QTL**  
 314 **region in *Xiphophorus hellerii*.** No differential expression between males and females in the  
 315 caudal fin was detected. Vertical axis indicates fold change of expression normalized to brain  
 316 (A),  
 317

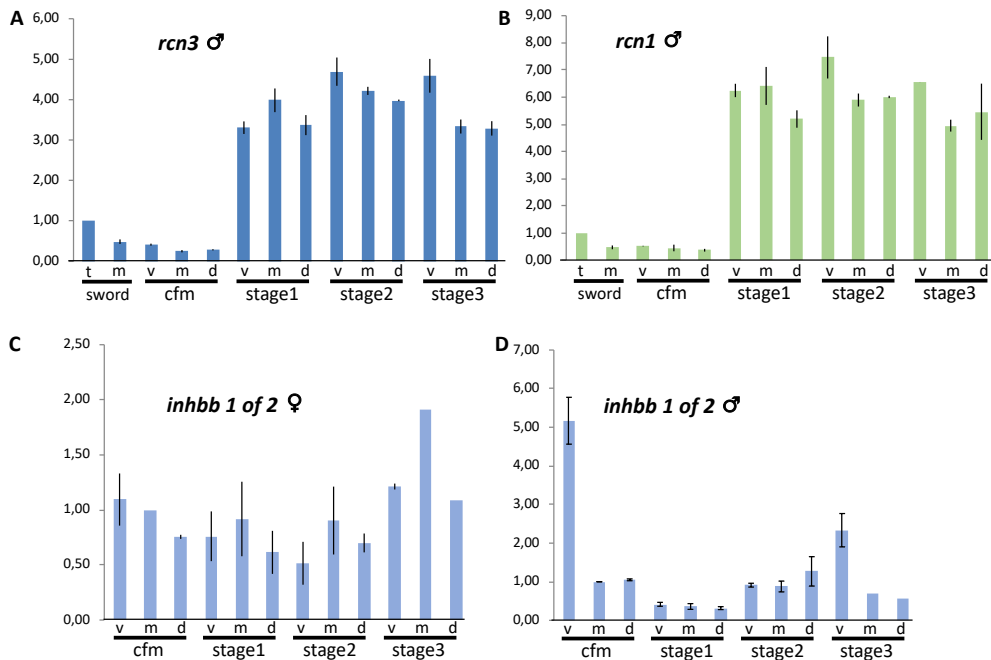

318  
319  
320  
321  
322  
323  
324

**Fig. S19: Expression patterns of genes that are regulated during regeneration.** Expression of *rcn3* (A) and *l* (B) and *inhbb1 of 2* (C,D) in the caudal fin margin of the tail fin (cfm) (v, ventral, m, median, d, dorsal compartment) of male (A,B,D) and female (C) *Xiphohorus hellerii*. Vertical axis indicates fold change of expression normalized to cfm, v (A,B) or cfm, m (C,D).

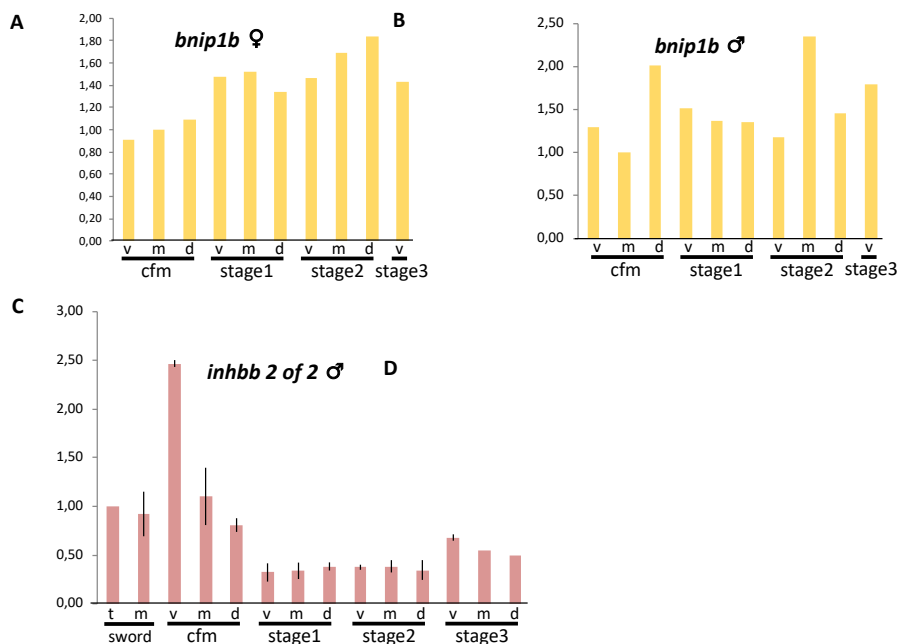

325  
326  
327  
328  
329  
330  
331

**Fig. S20: Expression patterns of genes that are regulated during regeneration.** Expression of *bnip1b* (A, B) and *inhbb2 of 2* (C) in the caudal fin margin of the tail fin (cfm) (v, ventral, m, median, d, dorsal compartment) of male (B, C) and female (A) *Xiphohorus hellerii* and during regeneration stages. Vertical axis indicates fold change of expression normalized to cfm, m (A, B) or sword, t.

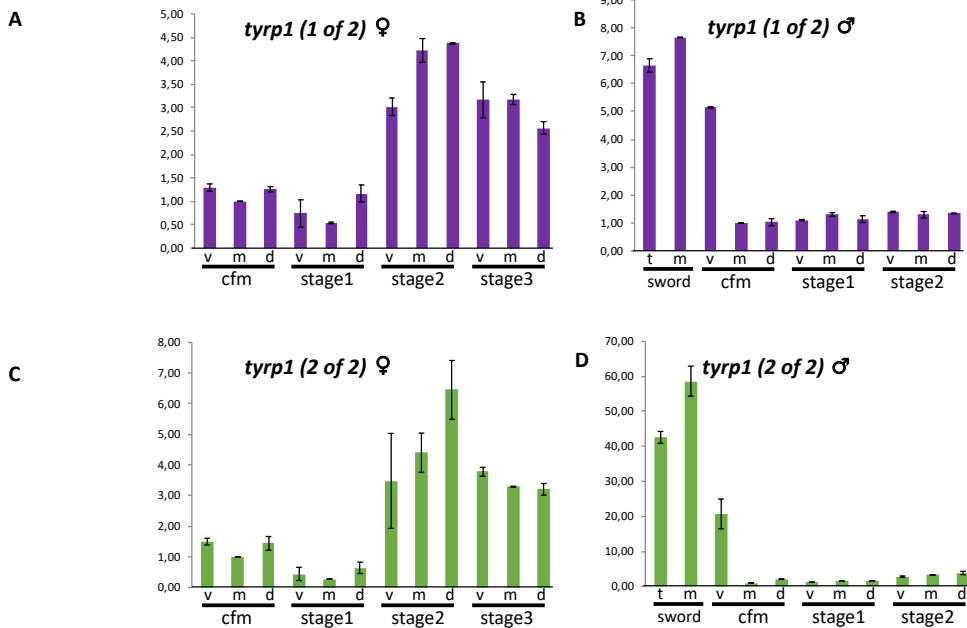

332  
 333 **Fig. S21: Expression of the pigmentation gene *tyrosinase related protein 1 (tyrp1)*.**  
 334 Expression of *tyrp1* ohnologs in the caudal fin margin of the tail fin (cfm) (v, ventral, m,  
 335 median, d, dorsal compartment) and during regeneration stages of adult *Xiphophorus hellerii*  
 336 females (A, C) and the sword in males (B, D). Vertical axis indicates fold change of  
 337 expression normalized to cfm, m.  
 338

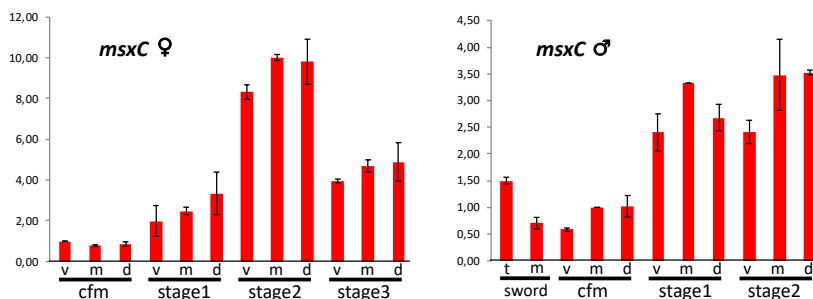

339  
 340 **Fig. S22: Expression of candidate gene *msxC*.** Expression of *msxC* in the caudal fin margin  
 341 of the tail fin (cfm) (v, ventral, m, median, d, dorsal compartment) and during regeneration  
 342 stages of adult *Xiphophorus hellerii* females (left) and the sword in males (right). Vertical  
 343 axis indicates fold change of expression normalized to cfm, v (females) or cfm, m (males).  
 344
